# Supplementary material for: The global technical and economic potential of bioenergy from salt-affected soils
Source: Royal Society of Chemistry journal article supplement (doi:10.1039/c1ee01029h), 2011-01-01
Supplement: c1ee01029h.pdf [file c1ee01029h.pdf]

Electronic Supplementary Information (ESI) for

## The global technical and economic potential of bioenergy from salt-affected soils

**Birka Wicke,<sup>\*,a</sup> Edward Smeets,<sup>a</sup> Veronika Dornburg,<sup>a</sup> Boris Vashev,<sup>b</sup> Thomas Gaiser,<sup>c</sup> Wim Turkenburg,<sup>a</sup> André Faaij<sup>a</sup>**

<sup>a</sup> *Utrecht University, Copernicus Institute, Department of Science, Technology and Society, Utrecht, Heidelberglaan 2, 3584 CS Utrecht, the Netherlands. Tel: +31 30 253 4299; Fax: +31 30 253 7601; Email: b.wicke@uu.nl, E.M.W.Smeets@uu.nl, ronid@xs4all.nl, w.c.turkenburg@uu.nl, a.p.c.faaij@uu.nl*

<sup>b</sup> *University of Hohenheim, Institute of Soil Science and Land Evaluation, Fruwirthstrasse 12, 70599 Stuttgart, Germany. Tel: +49 711 45924105; Fax: +49 711 45924071; Email: Boris.Vashev@umwelt.uni-giessen.de*

<sup>c</sup> *University of Bonn, Institute of Crop Science and Research Conservation, Katzenburgweg 5, 53115 Bonn, Germany. Tel: +49 228 732050; Fax: +49 228 732870; Email: tgaiser@uni-bonn.de*

ESI Table 1 Global technical biomass production potential, by type and severity of salt-affectedness, land use/cover, and regions

| Type         | Severity     | Land use/<br>cover        | Canada                    | F USSR | W Europe | USA | E Europe | E Asia | Japan | M East | S Asia | N Africa | C America | SE Asia | W Africa | Oceania | E Africa | S America | S Africa | Total |       |
|--------------|--------------|---------------------------|---------------------------|--------|----------|-----|----------|--------|-------|--------|--------|----------|-----------|---------|----------|---------|----------|-----------|----------|-------|-------|
| saline       | slight       | agriculture               | 0                         | 2344   | 1        | 25  | 1        | 246    | 0     | 135    | 126    | 2        | 1         | 0       | 0        | 453     | 21       | 982       | 27       | 5502  |       |
|              |              | shrub / herb <sup>a</sup> | 0                         | 3305   | 0        | 204 | 3        | 129    | 0     | 511    | 241    | 267      | 73        | 0       | 0        | 122     | 661      | 354       | 812      | 21832 |       |
|              |              | bare areas                | 0                         | 579    | 0        | 0   | 0        | 96     | 0     | 506    | 103    | 139      | 0         | 0       | 0        | 82      | 69       | 15        | 1        | 1590  |       |
|              |              | <b>total</b>              | 0                         | 6227   | 1        | 206 | 4        | 163    | 0     | 115    | 160    | 409      | 75        | 0       | 0        | 128     | 751      | 1350      | 840      | 28924 |       |
|              | moderate     | agriculture               | 0                         | 28     | 0        | 0   | 0        | 5      | 0     | 12     | 0      | 1        | 12        | 0       | 0        | 0       | 56       | 4         | 13       | 132   |       |
|              |              | shrub / herb <sup>a</sup> | 0                         | 57     | 0        | 0   | 0        | 22     | 0     | 113    | 0      | 28       | 143       | 0       | 0        | 0       | 345      | 107       | 488      | 1303  |       |
|              |              | bare areas                | 0                         | 61     | 0        | 0   | 0        | 30     | 0     | 126    | 0      | 69       | 0         | 0       | 0        | 0       | 71       | 31        | 0        | 388   |       |
|              |              | <b>total</b>              | 0                         | 146    | 0        | 0   | 0        | 57     | 0     | 252    | 0      | 98       | 155       | 0       | 0        | 0       | 471      | 142       | 501      | 1823  |       |
|              | Very         | agriculture               | 0                         | 1      | 0        | 0   | 0        | 7      | 0     | 0      | 0      | 0        | 0         | 0       | 0        | 0       | 0        | 0         | 0        | 0     | 8     |
|              |              | shrub / herb <sup>a</sup> | 0                         | 1      | 0        | 0   | 0        | 2      | 0     | 0      | 0      | 0        | 0         | 0       | 0        | 0       | 0        | 0         | 0        | 19    | 22    |
|              |              | bare areas                | 0                         | 0      | 0        | 0   | 0        | 0      | 0     | 0      | 0      | 0        | 0         | 0       | 0        | 0       | 0        | 0         | 0        | 1     | 1     |
|              |              | <b>total</b>              | 0                         | 1      | 0        | 0   | 0        | 9      | 0     | 0      | 0      | 0        | 0         | 0       | 0        | 0       | 0        | 0         | 0        | 20    | 31    |
|              | extreme      | agriculture               | 0                         | 4      | 0        | 0   | 0        | 0      | 0     | 0      | 0      | 0        | 0         | 0       | 0        | 0       | 0        | 0         | 1        | 0     | 5     |
|              |              | shrub / herb              | 0                         | 7      | 0        | 0   | 0        | 0      | 0     | 0      | 0      | 0        | 0         | 0       | 0        | 0       | 0        | 1         | 2        | 0     | 9     |
|              |              | bare areas                | 0                         | 9      | 0        | 0   | 0        | 0      | 0     | 0      | 0      | 0        | 0         | 0       | 0        | 0       | 0        | 0         | 1        | 0     | 9     |
|              |              | <b>total</b>              | 0                         | 19     | 0        | 0   | 0        | 0      | 0     | 0      | 0      | 0        | 0         | 0       | 0        | 0       | 1        | 4         | 0        | 23    |       |
|              |              | <b>total</b>              | 0                         | 6394   | 1        | 206 | 4        | 170    | 0     | 140    | 160    | 506      | 229       | 0       | 0        | 128     | 1223     | 1496      | 136      | 30800 |       |
|              | sodic        | slight                    | agriculture               | 237    | 233      | 12  | 166      | 38     | 17    | 0      | 0      | 61       | 107       | 1       | 367      | 39      | 348      | 72        | 410      | 135   | 2243  |
|              |              |                           | shrub / herb <sup>a</sup> | 245    | 668      | 1   | 237      | 0      | 40    | 0      | 0      | 10       | 33        | 0       | 44       | 69      | 931      | 2087      | 300      | 132   | 4796  |
|              |              |                           | bare areas                | 0      | 403      | 0   | 0        | 0      | 34    | 0      | 0      | 0        | 0         | 0       | 0        | 4       | 91       | 5         | 27       | 0     | 564   |
|              |              | <b>total</b>              | 482                       | 1304   | 13       | 403 | 38       | 90     | 0     | 0      | 70     | 140      | 1         | 411     | 112      | 137     | 2164     | 737       | 267      | 7603  |       |
| moderate     |              | agriculture               | 117                       | 806    | 0        | 187 | 54       | 378    | 0     | 1      | 157    | 212      | 0         | 0       | 221      | 860     | 224      | 1349      | 18       | 4583  |       |
|              |              | shrub / herb <sup>a</sup> | 61                        | 855    | 0        | 260 | 2        | 129    | 0     | 3      | 18     | 65       | 0         | 0       | 179      | 501     | 605      | 949       | 80       | 8224  |       |
|              |              | bare areas                | 0                         | 238    | 0        | 0   | 0        | 3      | 0     | 0      | 3      | 0        | 0         | 0       | 0        | 90      | 0        | 6         | 0        | 341   |       |
|              |              | <b>total</b>              | 178                       | 1899   | 0        | 447 | 57       | 509    | 0     | 4      | 178    | 277      | 0         | 0       | 400      | 596     | 829      | 2304      | 98       | 13147 |       |
| very         |              | agriculture               | 0                         | 0      | 0        | 0   | 0        | 0      | 0     | 0      | 0      | 0        | 0         | 0       | 0        | 0       | 17       | 480       | 0        | 497   |       |
|              |              | shrub / herb <sup>a</sup> | 0                         | 0      | 0        | 0   | 0        | 0      | 0     | 0      | 0      | 3        | 0         | 0       | 0        | 0       | 163      | 128       | 0        | 294   |       |
|              |              | bare areas                | 0                         | 0      | 0        | 0   | 0        | 0      | 0     | 0      | 0      | 0        | 0         | 0       | 0        | 0       | 0        | 24        | 0        | 24    |       |
|              |              | <b>total</b>              | 0                         | 0      | 0        | 0   | 0        | 0      | 0     | 0      | 0      | 3        | 0         | 0       | 0        | 0       | 179      | 632       | 0        | 814   |       |
| extreme      |              | agriculture               | 0                         | 0      | 0        | 0   | 20       | 0      | 0     | 0      | 0      | 0        | 0         | 36      | 0        | 0       | 8        | 11        | 2        | 78    |       |
|              |              | shrub / herb <sup>a</sup> | 0                         | 0      | 0        | 0   | 1        | 0      | 0     | 0      | 0      | 8        | 0         | 3       | 0        | 0       | 14       | 3         | 39       | 69    |       |
|              |              | bare areas                | 0                         | 0      | 0        | 0   | 0        | 0      | 0     | 0      | 0      | 12       | 0         | 0       | 0        | 0       | 2        | 0         | 0        | 14    |       |
|              |              | <b>total</b>              | 0                         | 0      | 0        | 0   | 21       | 0      | 0     | 0      | 0      | 20       | 0         | 39      | 0        | 0       | 22       | 16        | 42       | 160   |       |
|              |              | <b>total</b>              | 661                       | 3204   | 13       | 849 | 116      | 600    | 0     | 4      | 248    | 439      | 1         | 450     | 511      | 733     | 3195     | 3688      | 407      | 21725 |       |
| saline-sodic |              | slight                    | agriculture               | 0      | 0        | 0   | 0        | 0      | 0     | 0      | 0      | 0        | 0         | 0       | 0        | 2       | 0        | 109       | 0        | 0     | 111   |
|              |              |                           | shrub / herb <sup>a</sup> | 0      | 0        | 0   | 0        | 0      | 0     | 0      | 0      | 0        | 0         | 0       | 0        | 0       | 0        | 154       | 0        | 0     | 154   |
|              |              |                           | bare areas                | 0      | 0        | 0   | 0        | 0      | 0     | 0      | 0      | 0        | 0         | 0       | 0        | 1       | 0        | 0         | 0        | 0     | 1     |
|              |              | <b>total</b>              | 0                         | 0      | 0        | 0   | 0        | 0      | 0     | 0      | 0      | 0        | 0         | 0       | 3        | 0       | 263      | 0         | 0        | 267   |       |
|              | moderate     | agriculture               | 0                         | 20     | 8        | 0   | 9        | 35     | 0     | 0      | 0      | 1        | 0         | 0       | 0        | 0       | 9        | 6         | 1        | 88    |       |
|              |              | shrub / herb <sup>a</sup> | 0                         | 21     | 0        | 0   | 0        | 8      | 0     | 0      | 0      | 27       | 0         | 0       | 0        | 0       | 167      | 350       | 51       | 625   |       |
|              |              | bare areas                | 0                         | 5      | 0        | 0   | 0        | 0      | 0     | 0      | 0      | 0        | 0         | 0       | 0        | 0       | 1        | 0         | 0        | 6     |       |
|              |              | <b>total</b>              | 0                         | 46     | 8        | 0   | 9        | 43     | 0     | 0      | 0      | 28       | 0         | 0       | 0        | 0       | 176      | 357       | 52       | 718   |       |
|              | very         | agriculture               | 2                         | 0      | 0        | 0   | 1        | 0      | 0     | 22     | 759    | 1        | 0         | 0       | 47       | 0       | 0        | 7         | 840      |       |       |
|              |              | shrub / herb <sup>a</sup> | 1                         | 0      | 0        | 15  | 1        | 2      | 0     | 40     | 24     | 18       | 0         | 0       | 12       | 0       | 47       | 0         | 13       | 172   |       |
|              |              | bare areas                | 0                         | 0      | 0        | 0   | 0        | 0      | 0     | 48     | 3      | 11       | 0         | 0       | 5        | 0       | 0        | 0         | 0        | 66    |       |
|              |              | <b>total</b>              | 3                         | 0      | 0        | 15  | 1        | 2      | 0     | 111    | 786    | 30       | 0         | 0       | 64       | 0       | 47       | 0         | 20       | 1078  |       |
|              | extreme      | agriculture               | 1                         | 80     | 14       | 3   | 19       | 38     | 0     | 80     | 85     | 30       | 18        | 76      | 58       | 0       | 11       | 1         | 42       | 557   |       |
|              |              | shrub / herb <sup>a</sup> | 0                         | 168    | 1        | 26  | 5        | 21     | 0     | 117    | 14     | 61       | 12        | 2       | 165      | 48      | 32       | 3         | 79       | 755   |       |
|              |              | bare areas                | 0                         | 126    | 0        | 0   | 0        | 3      | 0     | 180    | 9      | 18       | 0         | 0       | 3        | 0       | 0        | 1         | 7        | 348   |       |
|              |              | <b>total</b>              | 1                         | 375    | 15       | 28  | 25       | 62     | 0     | 378    | 108    | 109      | 30        | 78      | 226      | 48      | 43       | 6         | 128      | 1660  |       |
|              |              | <b>total</b>              | 5                         | 420    | 23       | 43  | 35       | 107    | 0     | 488    | 894    | 168      | 30        | 78      | 293      | 48      | 529      | 363       | 199      | 3723  |       |
|              | <b>Total</b> |                           |                           | 665    | 1001     | 37  | 296      | 155    | 240   | 0      | 189    | 275      | 111       | 260     | 528      | 804     | 201      | 4947      | 5547     | 196   | 56248 |

| Type | Severity | Land use/<br>cover | Canada | F USSR | W Europe | USA | E Europe | E Asia | Japan | M East | S Asia | N Africa | C America | SE Asia | W Africa | Oceania | E Africa | S America | S Africa | Total |
|------|----------|--------------------|--------|--------|----------|-----|----------|--------|-------|--------|--------|----------|-----------|---------|----------|---------|----------|-----------|----------|-------|
|------|----------|--------------------|--------|--------|----------|-----|----------|--------|-------|--------|--------|----------|-----------|---------|----------|---------|----------|-----------|----------|-------|

a - shrub and herbaceous cover
